# Supplementary material for: Marker-Assisted Introgression of Saltol QTL Enhances Seedling Stage Salt Tolerance in the Rice Variety “Pusa Basmati 1”
Source: Hindawi journal article supplement (doi:10.1155/2018/8319879), 2018-01-01
Supplement: f1 [file 8319879.f1.pdf]

## *Supplementary materials*

### **Marker-assisted introgression of *Saltol* QTL enhances seedling stage salt tolerance in the rice variety ‘Pusa Basmati 1’**

**Vivek Kumar Singh, Brahma Deo Singh, Amit Kumar, Sadhna Maurya, Subbiayan Gopala Krishnan, Kunnnumal Kurungara Vinod, Madan Pal Singh, Ranjith Kumar Ellur, Prolay Kumar Bhowmick and Ashok Kumar Singh**

Correspondence should be addressed to Ashok Kumar Singh; aks\_gene@yahoo.com

SUPPLEMENTARY TABLE 1. Chromosome wise list of polymorphic STMS markers between PB1 and FL478

| <b>Marker No.</b>   | <b>Polymorphic Markers</b> | <b>Physical position (Mb)</b> | <b>Number of Marker used</b> | <b>Marker coverage Mb/marker</b> | <b>% polymorphism</b> |
|---------------------|----------------------------|-------------------------------|------------------------------|----------------------------------|-----------------------|
| <b>Chromosome 1</b> |                            |                               |                              |                                  |                       |
| 1                   | HVSSR01-32                 | 9.61                          | 42                           | 10.83                            | 9.50                  |
| 2                   | RM14                       | 25.65                         |                              |                                  |                       |
| 3                   | RM84                       | 31.50                         |                              |                                  |                       |
| 4                   | HVSSR01-79                 | 39.34                         |                              |                                  |                       |
| <b>Chromosome 2</b> |                            |                               |                              |                                  |                       |
| 5                   | HVSSR02-01                 | 0.12                          | 42                           | 7.18                             | 11.90                 |
| 6                   | RM475                      | 12.08                         |                              |                                  |                       |
| 7                   | RM262                      | 20.79                         |                              |                                  |                       |
| 8                   | HVSSR02-68                 | 27.95                         |                              |                                  |                       |
| 9                   | RM240                      | 32.39                         |                              |                                  |                       |
| <b>Chromosome 3</b> |                            |                               |                              |                                  |                       |
| 10                  | RM3716                     | 6.83                          | 30                           | 6.06                             | 20.00                 |
| 11                  | HVSSR03-37                 | 15.03                         |                              |                                  |                       |
| 12                  | RM564                      | 19.22                         |                              |                                  |                       |
| 13                  | RM16                       | 23.89                         |                              |                                  |                       |
| 14                  | RM168                      | 28.86                         |                              |                                  |                       |
| 15                  | HVSSR03-86                 | 32.85                         |                              |                                  |                       |
| <b>Chromosome 4</b> |                            |                               |                              |                                  |                       |
| 16                  | RM3892                     | 1.12                          | 31                           | 5.91                             | 19.35                 |
| 17                  | RM7200                     | 4.03                          |                              |                                  |                       |
| 18                  | HVSSR04-15                 | 11.39                         |                              |                                  |                       |
| 19                  | HVSSR04-28                 | 21.50                         |                              |                                  |                       |
| 20                  | RM3387                     | 24.68                         |                              |                                  |                       |
| 21                  | RM131                      | 35.01                         |                              |                                  |                       |
| <b>Chromosome 5</b> |                            |                               |                              |                                  |                       |
| 22                  | RM437                      | 3.87                          | 21                           | 6.00                             | 23.80                 |
| 23                  | HVSSR5-25                  | 9.12                          |                              |                                  |                       |
| 24                  | RM6645                     | 15.02                         |                              |                                  |                       |
| 25                  | RM3476                     | 23.84                         |                              |                                  |                       |
| 26                  | RM31                       | 28.75                         |                              |                                  |                       |

| Marker No.           | Polymorphic Markers | Physical position (Mb) | Number of Marker used | Marker coverage Mb/marker | % polymorphism |
|----------------------|---------------------|------------------------|-----------------------|---------------------------|----------------|
| <b>Chromosome 6</b>  |                     |                        |                       |                           |                |
| 27                   | RM204               | 3.17                   | 31                    | 6.26                      | 16.12          |
| 28                   | RM19973             | 13.42                  |                       |                           |                |
| 29                   | HVSSR06-40          | 17.35                  |                       |                           |                |
| 30                   | RM3                 | 20.38                  |                       |                           |                |
| 31                   | HVSSR06-56          | 26.55                  |                       |                           |                |
| <b>Chromosome 7</b>  |                     |                        |                       |                           |                |
| 32                   | RM21384             | 10.72                  | 38                    | 7.43                      | 10.52          |
| 33                   | RM7110              | 16.85                  |                       |                           |                |
| 34                   | RM1279              | 22.28                  |                       |                           |                |
| 35                   | RM21976             | 25.59                  |                       |                           |                |
| <b>Chromosome 8</b>  |                     |                        |                       |                           |                |
| 36                   | RM337               | 0.15                   | 21                    | 5.68                      | 23.80          |
| 37                   | RM3481              | 9.14                   |                       |                           |                |
| 38                   | HVSSR08-29          | 15.83                  |                       |                           |                |
| 39                   | RM3153              | 19.08                  |                       |                           |                |
| 40                   | RM80                | 24.57                  |                       |                           |                |
| <b>Chromosome 9</b>  |                     |                        |                       |                           |                |
| 41                   | RM5688              | 1.66                   | 28                    | 3.83                      | 21.42          |
| 42                   | HVSSR09-07          | 4.92                   |                       |                           |                |
| 43                   | RM23914             | 7.24                   |                       |                           |                |
| 44                   | RM3912              | 10.83                  |                       |                           |                |
| 45                   | HVSSR09-36          | 17.47                  |                       |                           |                |
| 46                   | RM205               | 22.72                  |                       |                           |                |
| <b>Chromosome 10</b> |                     |                        |                       |                           |                |
| 47                   | RM271               | 3.48                   | 34                    | 4.64                      | 14.70          |
| 48                   | RM25161             | 7.95                   |                       |                           |                |
| 49                   | RM311               | 9.74                   |                       |                           |                |
| 50                   | RM184               | 16.35                  |                       |                           |                |
| 51                   | RM590               | 23.04                  |                       |                           |                |
| <b>Chromosome 11</b> |                     |                        |                       |                           |                |
| 52                   | RM1124              | 3.84                   | 45                    | 4.83                      | 13.33          |
| 53                   | RM26499             | 11.00                  |                       |                           |                |
| 54                   | RM7226              | 16.34                  |                       |                           |                |
| 55                   | RM229               | 20.70                  |                       |                           |                |
| 56                   | RM1341              | 22.01                  |                       |                           |                |
| 57                   | RM330               | 25.15                  |                       |                           |                |
| <b>Chromosome 12</b> |                     |                        |                       |                           |                |
| 58                   | RM7619              | 4.83                   | 32                    | 5.50                      | 15.62          |
| 59                   | RM2935              | 7.43                   |                       |                           |                |
| 60                   | RM3137              | 8.16                   |                       |                           |                |
| 61                   | RM1261              | 17.68                  |                       |                           |                |
| 62                   | RM463               | 22.09                  |                       |                           |                |

SUPPLEMENTARY TABLE 2. Information on *Saltol* linked SSR markers on chromosome1 polymorphic between PB1 and FL478

| Marker  | FL478 allele | PB1 allele | Primer sequences                                          | Motif   | T <sub>a</sub> | AL <sub>e</sub> | Position (Mb) |
|---------|--------------|------------|-----------------------------------------------------------|---------|----------------|-----------------|---------------|
| RM8094  | 220 bp       | 175 bp     | F: AAGTTTGTACACATCGTATACA<br>R: CGCGACCAGTACTACTACTA      | (AT)31  | 55             | 209             | 11.2          |
| RM493   | 250 bp       | 230 bp     | F: TAGCTCCAACAGGATCGACC<br>R: GTACGTAAACGCGGAAGGTG        | (CTT)9  | 55             | 211             | 12.2          |
| RM10793 | 150 bp       | 130 bp     | F: ACTTGCCAACTCCTTCAATTCG<br>R: TCGTCGAGTAGCTTCCCTCTCTACC | (ATAG)7 | 55             | 124             | 12.5          |

T<sub>a</sub>, annealing temperature in °C; AL<sub>e</sub>, expected amplicon length in bp (Thomson et al. 2010)

SUPPLEMENTARY TABLE 3. Agronomic performance, salt tolerance and recurrent parent genome recovery of *Saltol* positive homozygous BC<sub>2</sub>F<sub>2</sub> plants

| No.       | Plant ID          | Phenotypic selection |      |      |       |      | Foreground selection |       |         | Background selection |   |    |       | STS |
|-----------|-------------------|----------------------|------|------|-------|------|----------------------|-------|---------|----------------------|---|----|-------|-----|
|           |                   | PH                   | NT   | PL   | FG/P  | TW   | RM8094               | RM493 | RM10793 | RP                   | H | DP | RPG%  |     |
| <b>1</b>  | PUSA 1822-6-1-4   | 101.3                | 21.0 | 21.9 | 140.0 | 23.4 | ++                   | ++    | ++      | 53                   | 8 | 1  | 91.94 | 7.0 |
| <b>2</b>  | PUSA 1822-6-1-10  | 102.4                | 23.0 | 23.2 | 139.0 | 19.8 | ++                   | ++    | ++      | 54                   | 7 | 1  | 92.74 | 7.0 |
| <b>3</b>  | PUSA 1822-6-4-2   | 100.9                | 19.0 | 19.0 | 133.0 | 24.2 | ++                   | ++    | ++      | 54                   | 5 | 3  | 91.13 | 7.0 |
| <b>4</b>  | PUSA 1822-6-4-8   | 102.1                | 21.0 | 21.5 | 132.0 | 21.4 | ++                   | ++    | ++      | 54                   | 5 | 3  | 91.13 | 7.0 |
| <b>5</b>  | PUSA 1822-6-6-6   | 101.2                | 22.0 | 19.8 | 135.0 | 19.9 | ++                   | ++    | ++      | 53                   | 6 | 3  | 90.32 | 5.0 |
| <b>6</b>  | PUSA 1822-6-6-15  | 102.7                | 19.0 | 22.5 | 134.0 | 21.5 | ++                   | ++    | ++      | 54                   | 5 | 3  | 91.13 | 7.0 |
| <b>7</b>  | PUSA 1822-6-9-13  | 103.6                | 21.0 | 24.2 | 130.0 | 23.9 | ++                   | ++    | ++      | 53                   | 6 | 3  | 90.32 | 7.0 |
| <b>8</b>  | PUSA 1822-6-11-4  | 103.3                | 18.0 | 18.9 | 137.0 | 21.7 | ++                   | ++    | ++      | 54                   | 5 | 3  | 91.13 | 5.0 |
| <b>9</b>  | PUSA 1822-6-11-5  | 103.7                | 24.0 | 25.7 | 140.0 | 22.3 | ++                   | ++    | ++      | 52                   | 7 | 3  | 89.52 | 7.0 |
| <b>10</b> | PUSA 1822-6-11-11 | 103.9                | 19.0 | 22.3 | 138.0 | 24.2 | ++                   | ++    | ++      | 53                   | 6 | 3  | 90.32 | 7.0 |
| <b>11</b> | PUSA 1822-6-14-9  | 102.4                | 23.0 | 21.1 | 137.0 | 23.3 | ++                   | ++    | ++      | 54                   | 7 | 1  | 92.74 | 1.0 |
| <b>RP</b> | PB1               | 101.4                | 25.0 | 23.5 | 145.0 | 23.7 | --                   | --    | --      | 62                   | 0 | 0  | 100.0 | 9.0 |
| <b>DP</b> | FL478             | 97.3                 | 12.0 | 24.0 | 122.0 | 25.0 | ++                   | ++    | ++      | 0                    | 0 | 62 | 0.0   | 1.0 |
|           | SD±               | 1.7                  | 3.3  | 2.1  | 5.7   | 1.7  |                      |       |         |                      |   |    |       |     |
|           | SE±               | 0.5                  | 0.9  | 0.6  | 1.6   | 0.5  |                      |       |         |                      |   |    |       |     |

PH, plant height in cm; NT, number of tillers/ plant; PL, panicle length in cm; FG/P, filled grain/ panicle; TW, thousand grain weight in g; RP, Recurrent Parent; DP, Donor Parent; H, Heterozygous; RPG, Recurrent Parent Genome recovery; STS, salt tolerance score

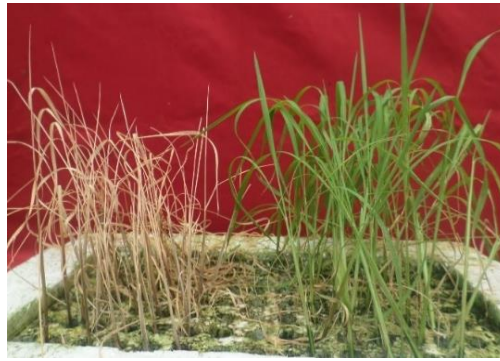

PB1

FL478

(a) Phenotypic evaluation of recurrent parent (RP) and donor parent (DP) for salinity tolerance

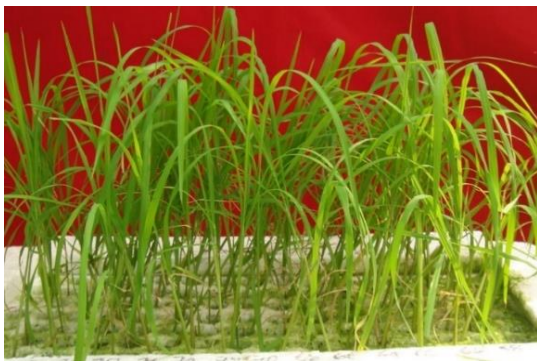

Unstressed

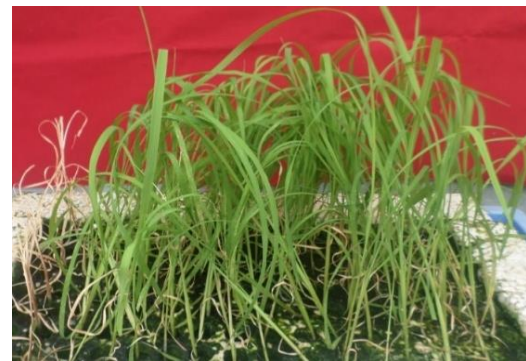

Stressed

(b) Screening of *Saltol* positive homozygous BC<sub>2</sub>F<sub>3</sub> plants for salinity tolerance

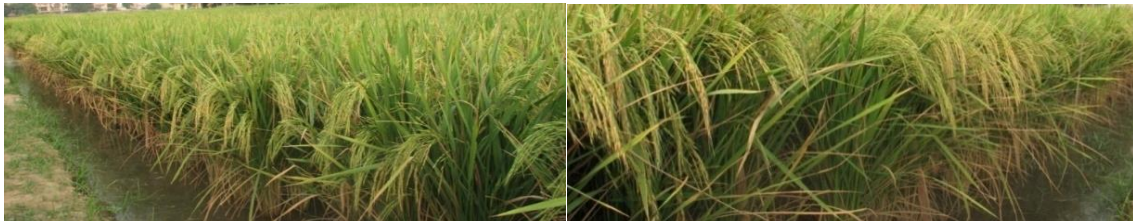

(c) Field view of agronomic evaluation of PB1 NILs, derived from Pusa 1822-6-14-9 with high level of salt tolerance

SUPPLEMENTARY FIGURE 1. Phenotypic evaluation for salt tolerance between parents and introgressed lines with their field view.

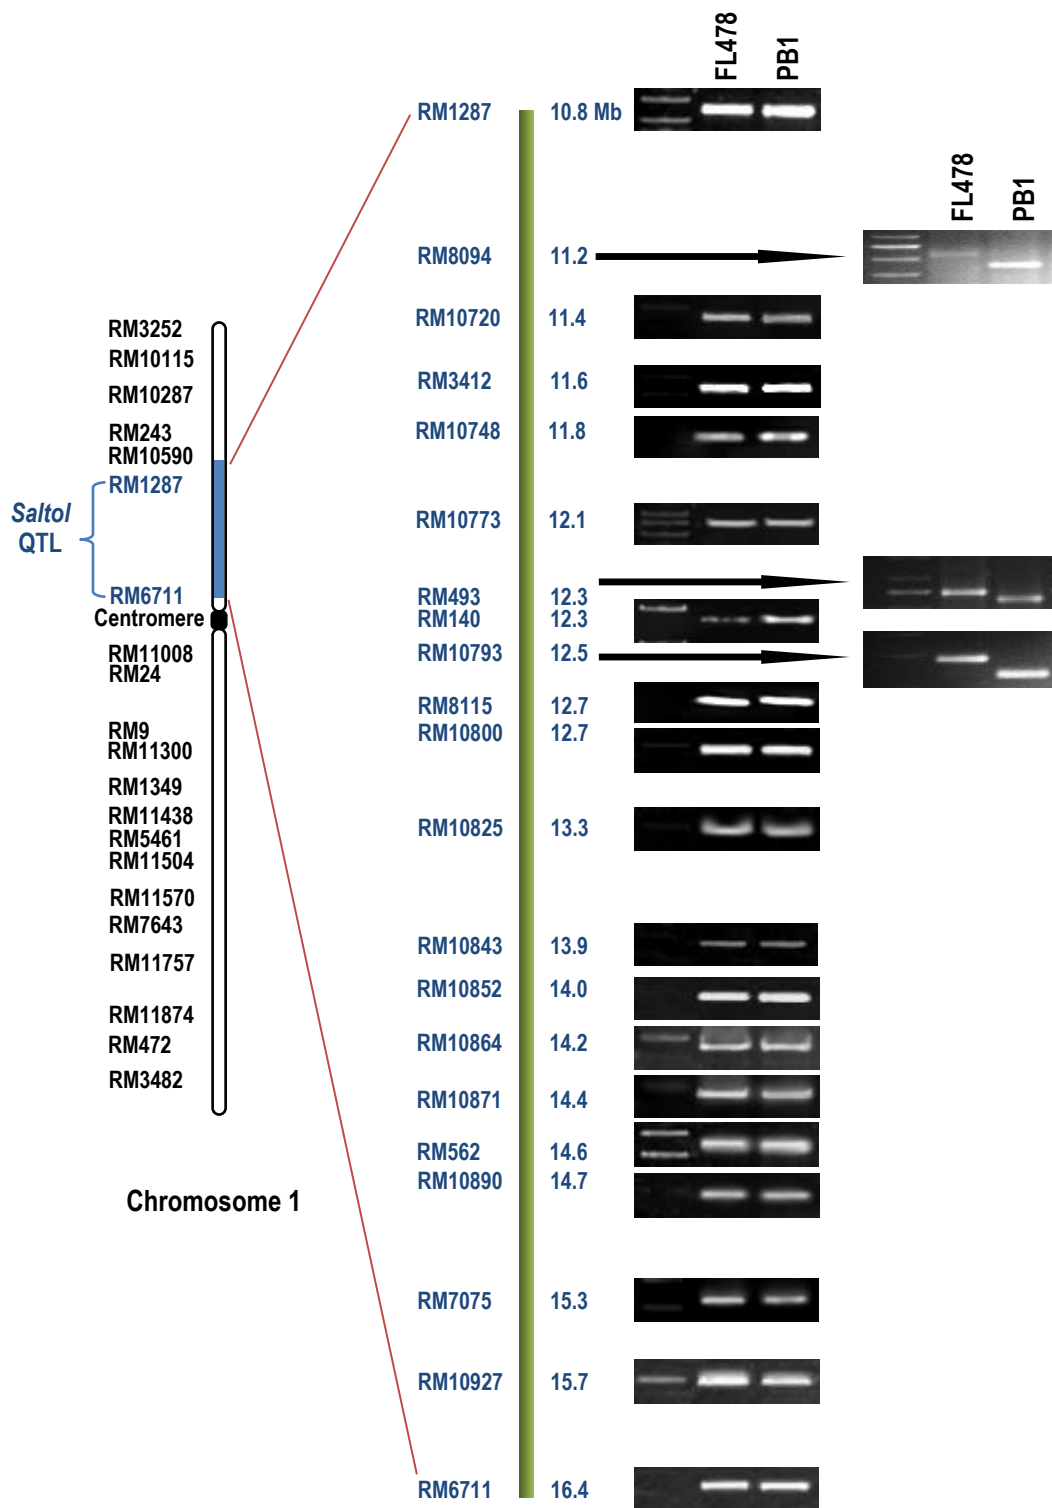

SUPPLEMENTARY FIGURE 2. Screening of foreground markers in the parental lines. Three markers RM8094, RM493 and RM10793 showed polymorphism between PB1 and FL478.
